# Supplementary material
Source: PubMed Central journal article supplement (PMC2268587)

**A**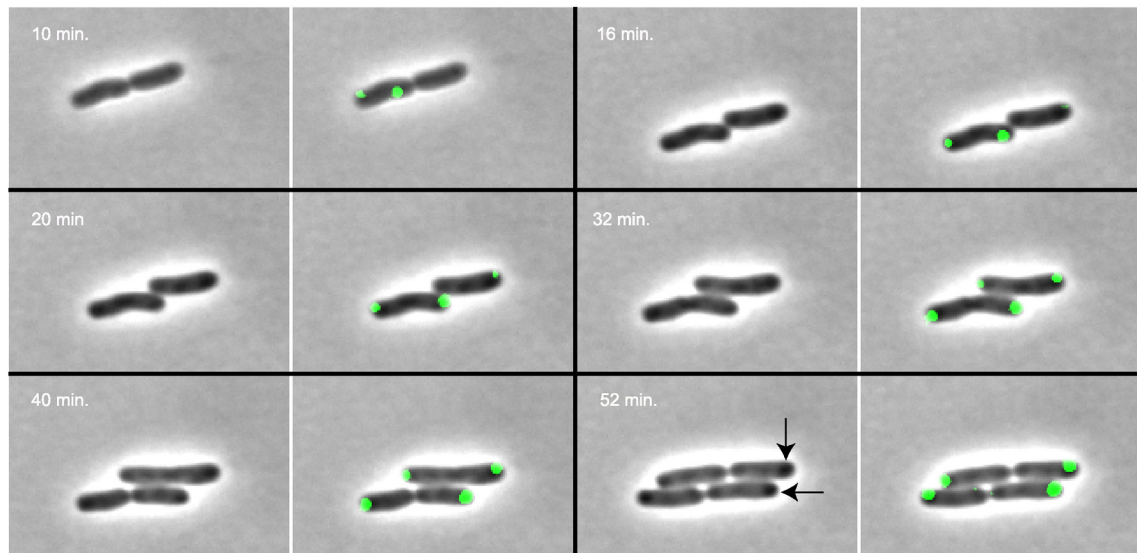**B**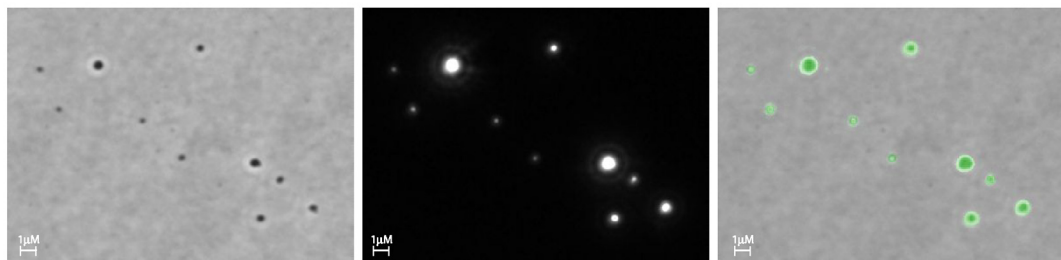

Supplement: pnas_0708931105_1.pdf [file pnas_0708931105_1.pdf]

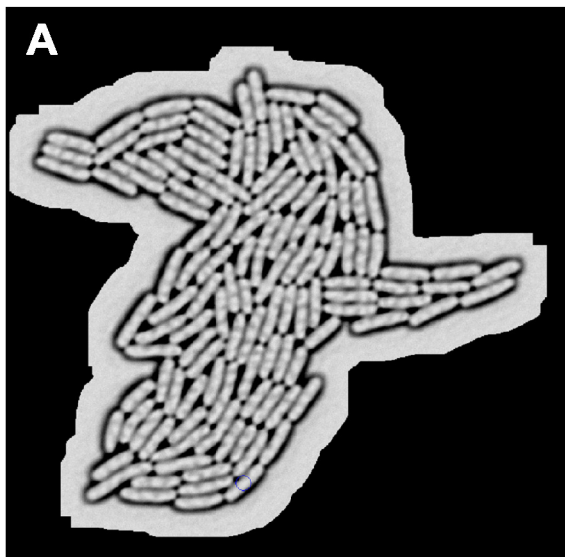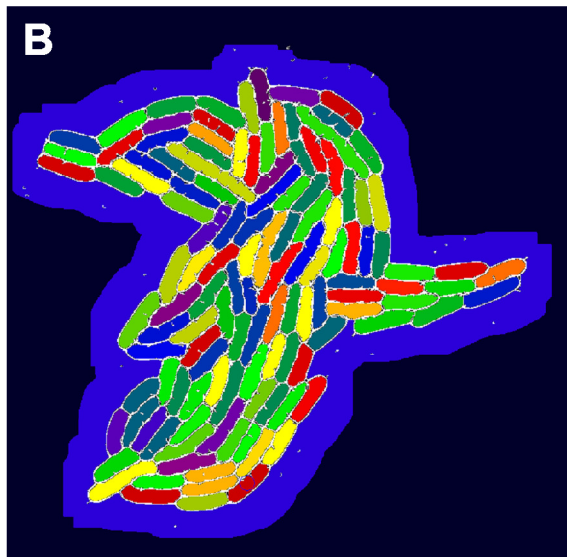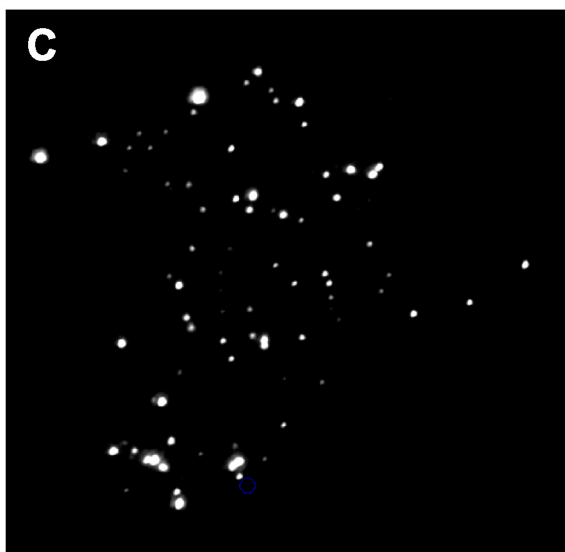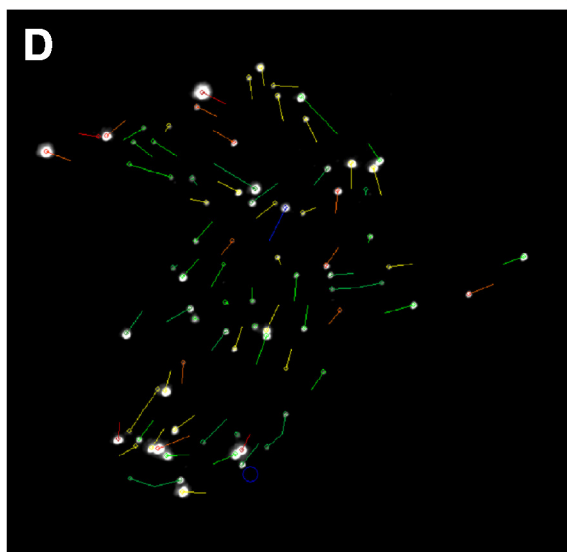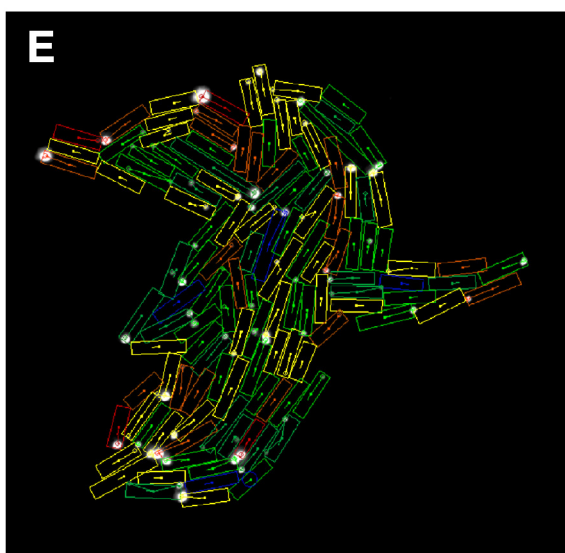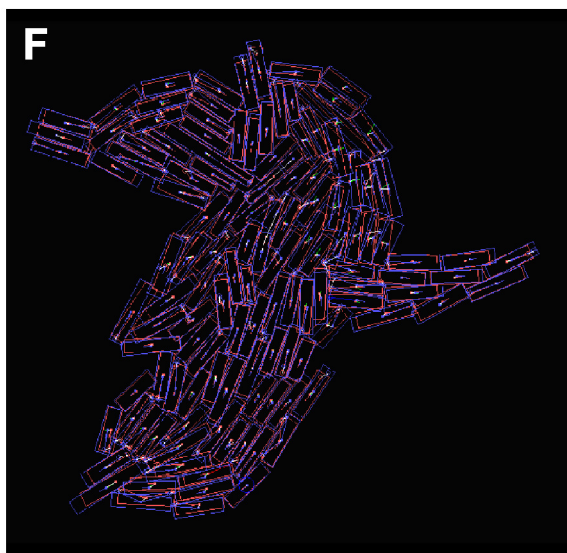

Supplement: pnas_0708931105_2.pdf [file pnas_0708931105_2.pdf]

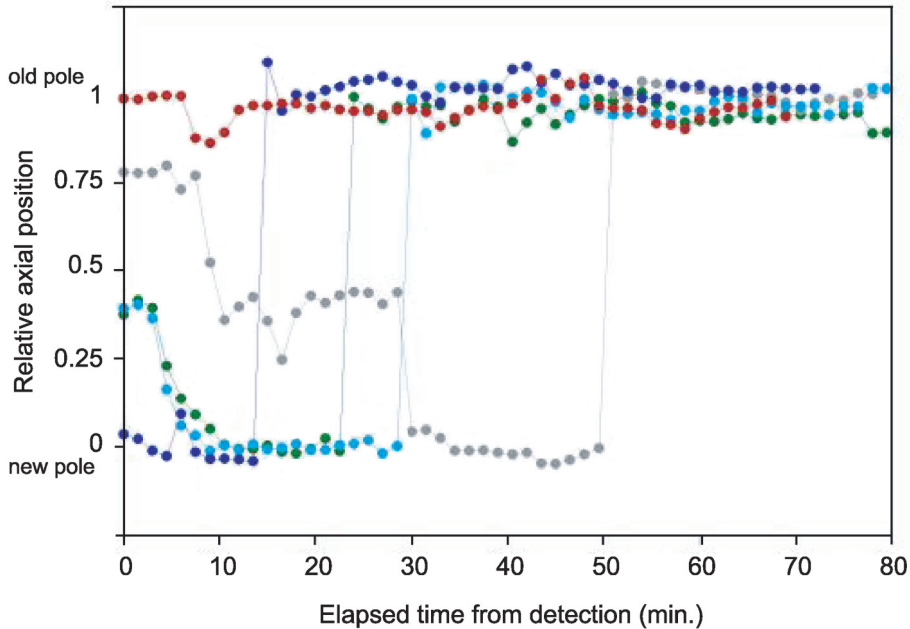

Supplement: pnas_0708931105_3.pdf [file pnas_0708931105_3.pdf]

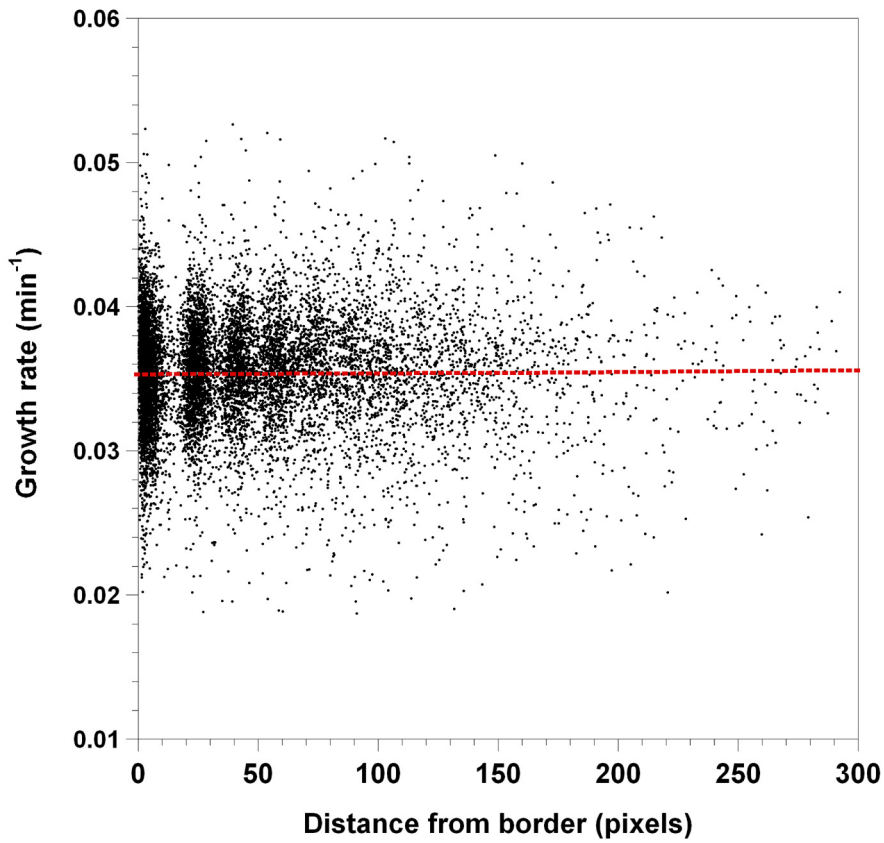

Supplement: pnas_0708931105_4.pdf [file pnas_0708931105_4.pdf]
